# Supplementary material for: Organizational Downsizing, Work Conditions, and Employee Outcomes: Identifying Targets for Workplace Intervention among Survivors
Source: MDPI journal article supplement (doi:10.3390/ijerph17030719), 2020-01-22
Supplement: s1 [file s1]

## Appendix S1

This appendix contains a key linking variable names with construct names, as well as means, standard deviations, and correlations for all 70 variables used in the structural model. See the Measures section in the article for the scoring of all variables. For reported correlations, a correlation with an absolute value  $\geq .041$  is significant at  $p < .05$ .

## Variable to Construct Key

| Variable name | Construct name                                | Variable name                | Construct Name                                   |
|---------------|-----------------------------------------------|------------------------------|--------------------------------------------------|
| LAYOFF        | Organizational downsizing                     | <b>U.S. Census region</b>    | <b>U.S. Census region</b>                        |
| WRKDMND       | Work demands                                  | MA                           | Middle Atlantic                                  |
| ROLECONF      | Role conflict                                 | ENC                          | East North Central                               |
| ROLEAMB       | Role ambiguity                                | WNC                          | West North Central                               |
| WORKAUT       | Work autonomy                                 | SA                           | South Atlantic                                   |
| COWAGGR2      | Coworker aggression                           | ESC                          | East South Central                               |
| SUPAGGR2      | Supervisor aggression                         | WSC                          | West South Central                               |
| FRNDFRM2      | Friendship formation                          | MNT                          | Mountain                                         |
| POORLDR       | Dysfunctional leadership                      | PAC                          | Pacific                                          |
| ORGJUST       | Distributive justice                          | <b>Occupation categories</b> | <b>Occupation categories</b>                     |
| PROMO2        | Promotion opportunity                         | SOC2NN2                      | Professional                                     |
| JOBINSEC      | Job insecurity                                | SOC2NN3                      | Service                                          |
| EMPINSEC      | Employment insecurity                         | SOC2NN4                      | Sales                                            |
| NEGRUM        | Negative work rumination                      | SOC2NN5                      | Office/administrative support                    |
| IUFREQ        | Inability to unwind                           | SOC2NN7                      | Construction/extraction/farming/fishing/forestry |
| PFAT          | Physical work fatigue                         | SOC2NN8                      | Installation/maintenance/repair                  |
| MFAT          | Mental work fatigue                           | SOC2NN9                      | Production                                       |
| EFAT          | Emotional work fatigue                        | SOC2NN10                     | Transportation/material moving                   |
| DEP           | Depression                                    | <b>Industry categories</b>   | <b>Industry categories</b>                       |
| ANX           | Anxiety                                       | NAICSA2                      | Manufacturing                                    |
| ANG           | Anger                                         | NAICSA3                      | Trade                                            |
| HAP           | Happiness                                     | NAICSA4                      | Information sector                               |
| CONF          | Confidence                                    | NAICSA5                      | Financial/real estate/management companies       |
| VIG           | Vigor                                         | NAICSA6                      | Professional/scientific/technical services       |
| PHLTHO        | Physical health                               | NAICSA7                      | Education services                               |
| MHLTHO        | Mental health                                 | NAICSA8                      | Health services                                  |
| JOBSAT        | Job satisfaction                              | NAICSA9                      | Leisure/hospitality                              |
| ORGCOMIT      | Organizational commitment                     | NAICSA10                     | Administrative/support/other services            |
| TURNOVER      | Turnover intentions                           | NAICSA11                     | Government/utilities                             |
| GENDERM       | Gender                                        | NAICSA12                     | Transportation                                   |
| RACE2         | Race                                          | JTYEAR                       | Job tenure                                       |
| AGE           | Age                                           | NWHR560                      | Number of weekly work hours                      |
| EDUC          | Education                                     | SEASONAL                     | Seasonal job                                     |
| INCOME10      | Total family income                           | PRECAREM                     | Precarious employment                            |
| NWRKLOC       | Employer has more than one work location      | UNION                        | Union member                                     |
| EMPWLOC       | Number of employees at work location          | QUARTER                      | Calendar quarter of interview                    |
| EMPWTOT       | Total number of employees in the organization |                              |                                                  |

## Means / Standard Deviations

|                  |                    |                  |                   |                  |
|------------------|--------------------|------------------|-------------------|------------------|
| LAYOFF           | WRKDMND            | ROLECONF         | ROLEAMB           | WORKAUT          |
| 0.366 /<br>0.482 | 2.453 /<br>1.088   | 2.599 /<br>0.964 | 1.504 /<br>0.601  | 3.365 /<br>0.657 |
| COWAGGR2         | SUPAGGR2           | FRNDFRM2         | POORLDR           | ORGJUST          |
| 0.462 /<br>0.747 | 0.466 /<br>0.727   | 3.209 /<br>0.804 | 1.864 /<br>0.777  | 2.813 /<br>0.981 |
| PROMO2           | JOBINSEC           | EMPINSEC         | NEGRUM            | IUFREQ           |
| 2.356 /<br>1.001 | 1.782 /<br>0.872   | 2.177 /<br>0.913 | 1.696 /<br>0.782  | 1.846 /<br>1.237 |
| PFAT             | MFAT               | EFAT             | DEP               | ANX              |
| 1.845 /<br>1.153 | 1.746 /<br>1.159   | 1.196 /<br>1.094 | 1.316 /<br>0.644  | 1.803 /<br>0.652 |
| ANG              | HAP                | CONF             | VIG               | PHLTHO           |
| 1.249 /<br>0.640 | 2.692 /<br>0.444   | 2.546 /<br>0.489 | 2.540 /<br>0.527  | 3.625 /<br>0.838 |
| MHLTHO           | JOBSAT             | ORGCOMIT         | TURNOVER          | GENDERM          |
| 3.801 /<br>0.871 | 3.404 /<br>0.786   | 2.918 /<br>0.971 | 1.839 /<br>0.966  | 0.522 /<br>0.500 |
| RACE2            | AGE                | EDUC             | INCOME10          | MA               |
| 0.316 /<br>0.465 | 40.248 /<br>12.659 | 5.860 /<br>2.225 | 8.112 /<br>12.211 | 0.140 /<br>0.346 |

|                    |                  |                  |                  |                  |
|--------------------|------------------|------------------|------------------|------------------|
| ENC                | WNC              | SA               | ESC              | WSC              |
| 0.152 /<br>0.359   | 0.073 /<br>0.261 | 0.208 /<br>0.406 | 0.065 /<br>0.247 | 0.086 /<br>0.279 |
| MNT                | PAC              | SOC2NN2          | SOC2NN3          | SOC2NN4          |
| 0.062 /<br>0.243   | 0.166 /<br>0.371 | 0.322 /<br>0.467 | 0.149 /<br>0.356 | 0.079 /<br>0.270 |
| SOC2NN5            | SOC2NN7          | SOC2NN8          | SOC2NN9          | SOC2NN10         |
| 0.144 /<br>0.351   | 0.030 /<br>0.170 | 0.037 /<br>0.187 | 0.037 /<br>0.190 | 0.068 /<br>0.253 |
| NAICSA2            | NAICSA3          | NAICSA4          | NAICSA5          | NAICSA6          |
| 0.101 /<br>0.302   | 0.123 /<br>0.329 | 0.029 /<br>0.167 | 0.069 /<br>0.255 | 0.065 /<br>0.247 |
| NAICSA7            | NAICSA8          | NAICSA9          | NAICSA10         | NAICSA11         |
| 0.141 /<br>0.348   | 0.149 /<br>0.356 | 0.096 /<br>0.295 | 0.064 /<br>0.245 | 0.079 /<br>0.270 |
| NAICSA12           | NWRKLOC          | EMPWLOC          | EMPWTOT          | JTYEAR           |
| 0.040 /<br>0.195   | 0.686 /<br>0.464 | 4.166 /<br>2.710 | 6.387 /<br>3.448 | 5.407 /<br>6.314 |
| NWHR60             | SEASONAL         | PRECAREM         | UNION            | QUARTER          |
| 40.838 /<br>11.483 | 0.063 /<br>0.243 | 0.148 /<br>0.355 | 0.175 /<br>0.379 | 4.366 /<br>2.321 |

### Correlations

|          | WRKDMND | ROLECONF | ROLEAMB | WORKAUT | COWAGGR2 |
|----------|---------|----------|---------|---------|----------|
|          | <hr/>   | <hr/>    | <hr/>   | <hr/>   | <hr/>    |
| WRKDMND  | 1.000   |          |         |         |          |
| ROLECONF | 0.347   | 1.000    |         |         |          |
| ROLEAMB  | 0.203   | 0.310    | 1.000   |         |          |
| WORKAUT  | -0.050  | -0.016   | -0.203  | 1.000   |          |
| COWAGGR2 | 0.199   | 0.249    | 0.165   | -0.133  | 1.000    |
| SUPAGGR2 | 0.273   | 0.329    | 0.311   | -0.250  | 0.431    |
| FRNDFRM2 | -0.056  | -0.060   | -0.165  | 0.118   | -0.113   |
| POORLDR  | 0.337   | 0.424    | 0.418   | -0.231  | 0.333    |
| ORGJUST  | -0.213  | -0.265   | -0.325  | 0.225   | -0.164   |
| PROMO2   | -0.138  | -0.100   | -0.179  | 0.082   | -0.088   |
| JOBINSEC | 0.113   | 0.135    | 0.250   | -0.223  | 0.093    |
| EMPINSEC | 0.060   | 0.034    | 0.159   | -0.200  | 0.074    |
| NEGRUM   | 0.322   | 0.210    | 0.228   | -0.007  | 0.149    |
| IUFREQ   | 0.365   | 0.245    | 0.147   | -0.045  | 0.164    |
| PFAT     | 0.336   | 0.182    | 0.119   | -0.155  | 0.187    |
| MFAT     | 0.391   | 0.215    | 0.184   | -0.067  | 0.149    |
| EFAT     | 0.338   | 0.272    | 0.202   | -0.090  | 0.208    |
| DEP      | 0.163   | 0.113    | 0.156   | -0.110  | 0.163    |
| ANX      | 0.169   | 0.129    | 0.136   | -0.112  | 0.115    |
| ANG      | 0.173   | 0.100    | 0.105   | -0.043  | 0.162    |
| HAP      | -0.132  | -0.118   | -0.144  | 0.101   | -0.158   |
| CONF     | -0.091  | -0.066   | -0.182  | 0.150   | -0.106   |
| VIG      | -0.081  | -0.099   | -0.148  | 0.110   | -0.127   |
| PHLTHO   | -0.060  | -0.094   | -0.098  | 0.080   | -0.063   |
| MHLTHO   | -0.117  | -0.139   | -0.156  | 0.118   | -0.156   |
| JOBSAT   | -0.219  | -0.290   | -0.357  | 0.304   | -0.293   |

|          | WRKDMND | ROLECONF | ROLEAMB | WORKAUT | COWAGGR2 |
|----------|---------|----------|---------|---------|----------|
| ORGCOMIT | -0.137  | -0.239   | -0.278  | 0.277   | -0.235   |
| TURNOVER | 0.185   | 0.301    | 0.302   | -0.181  | 0.240    |
| LAYOFF   | 0.136   | 0.125    | 0.085   | 0.047   | 0.051    |
| GENDERM  | 0.003   | 0.047    | 0.082   | 0.037   | 0.057    |
| RACE2    | -0.036  | 0.046    | -0.033  | -0.073  | -0.009   |
| AGE      | 0.071   | -0.039   | 0.010   | 0.142   | -0.084   |
| EDUC     | 0.136   | -0.030   | 0.153   | 0.115   | -0.101   |
| INCOME10 | 0.080   | 0.018    | 0.090   | 0.123   | 0.042    |
| MA       | 0.005   | -0.004   | -0.016  | -0.015  | -0.015   |
| ENC      | 0.017   | -0.006   | -0.002  | -0.029  | 0.010    |
| WNC      | 0.005   | 0.008    | 0.039   | -0.040  | 0.000    |
| SA       | -0.037  | -0.050   | -0.022  | -0.011  | -0.060   |
| ESC      | -0.044  | 0.018    | -0.021  | -0.020  | -0.029   |
| WSC      | -0.028  | -0.016   | -0.034  | 0.041   | 0.079    |
| MNT      | 0.016   | 0.042    | 0.031   | 0.045   | 0.037    |
| PAC      | 0.063   | 0.035    | 0.027   | 0.029   | 0.008    |
| SOC2NN2  | 0.115   | -0.041   | 0.067   | 0.053   | -0.084   |
| SOC2NN3  | -0.093  | 0.013    | -0.028  | -0.096  | 0.041    |
| SOC2NN4  | 0.001   | 0.049    | -0.058  | -0.012  | 0.049    |
| SOC2NN5  | -0.062  | -0.009   | -0.016  | -0.053  | -0.024   |
| SOC2NN7  | -0.003  | 0.004    | -0.015  | 0.010   | -0.017   |
| SOC2NN8  | -0.043  | -0.043   | -0.019  | 0.022   | 0.030    |
| SOC2NN9  | -0.012  | -0.016   | -0.039  | -0.030  | 0.054    |
| SOC2NN10 | -0.041  | 0.026    | -0.079  | -0.103  | 0.078    |
| NAICSA2  | 0.013   | 0.037    | 0.058   | 0.009   | 0.061    |
| NAICSA3  | 0.016   | 0.086    | -0.045  | -0.044  | 0.114    |
| NAICSA4  | 0.009   | 0.017    | 0.039   | 0.050   | -0.047   |

|          | WRKDMND | ROLECONF | ROLEAMB | WORKAUT | COWAGGR2 |
|----------|---------|----------|---------|---------|----------|
| NAICSA5  | -0.003  | -0.033   | 0.001   | 0.059   | -0.034   |
| NAICSA6  | 0.060   | 0.008    | 0.115   | 0.023   | -0.062   |
| NAICSA7  | 0.040   | -0.066   | -0.033  | 0.027   | -0.076   |
| NAICSA8  | 0.016   | -0.008   | -0.025  | 0.016   | -0.023   |
| NAICSA9  | -0.065  | 0.021    | -0.057  | -0.096  | 0.039    |
| NAICSA10 | -0.044  | -0.019   | -0.006  | 0.035   | -0.032   |
| NAICSA11 | -0.055  | -0.044   | 0.002   | 0.028   | 0.008    |
| NAICSA12 | -0.018  | -0.032   | -0.030  | -0.128  | 0.021    |
| NWRKLOC  | 0.072   | 0.050    | 0.008   | 0.001   | 0.046    |
| EMPWLOC  | 0.066   | 0.062    | 0.049   | -0.008  | 0.046    |
| EMPWTOT  | 0.111   | 0.069    | 0.047   | -0.037  | 0.075    |
| JTYEAR   | 0.074   | -0.031   | -0.060  | 0.083   | -0.027   |
| NWHR560  | 0.248   | 0.133    | 0.083   | 0.168   | 0.086    |
| SEASONAL | -0.001  | -0.006   | -0.049  | -0.057  | -0.018   |
| PRECAREM | -0.010  | -0.008   | -0.018  | -0.026  | 0.019    |
| UNION    | 0.080   | -0.037   | -0.062  | -0.089  | 0.030    |
| QUARTER  | -0.028  | -0.006   | -0.032  | -0.026  | -0.014   |

|          | SUPAGGR2 | FRNDFRM2 | POORLDR | ORGJUST | PROMO2 |
|----------|----------|----------|---------|---------|--------|
|          | <hr/>    | <hr/>    | <hr/>   | <hr/>   | <hr/>  |
| SUPAGGR2 | 1.000    |          |         |         |        |
| FRNDFRM2 | -0.102   | 1.000    |         |         |        |
| POORLDR  | 0.492    | -0.200   | 1.000   |         |        |
| ORGJUST  | -0.277   | 0.160    | -0.411  | 1.000   |        |
| PROMO2   | -0.177   | 0.094    | -0.276  | 0.387   | 1.000  |
| JOBINSEC | 0.206    | -0.178   | 0.246   | -0.282  | -0.233 |
| EMPINSEC | 0.072    | -0.156   | 0.102   | -0.170  | -0.179 |
| NEGRUM   | 0.189    | -0.040   | 0.264   | -0.222  | -0.130 |
| IUFREQ   | 0.201    | -0.016   | 0.257   | -0.153  | -0.107 |
| PFAT     | 0.273    | -0.069   | 0.256   | -0.191  | -0.116 |
| MFAT     | 0.246    | -0.009   | 0.217   | -0.175  | -0.096 |
| EFAT     | 0.268    | -0.102   | 0.297   | -0.206  | -0.131 |
| DEP      | 0.187    | -0.110   | 0.193   | -0.178  | -0.127 |
| ANX      | 0.139    | -0.094   | 0.164   | -0.165  | -0.097 |
| ANG      | 0.132    | -0.094   | 0.171   | -0.147  | -0.048 |
| HAP      | -0.155   | 0.180    | -0.207  | 0.184   | 0.126  |
| CONF     | -0.111   | 0.122    | -0.152  | 0.183   | 0.146  |
| VIG      | -0.141   | 0.135    | -0.168  | 0.194   | 0.125  |
| PHLTHO   | -0.116   | 0.078    | -0.112  | 0.145   | 0.057  |
| MHLTHO   | -0.216   | 0.079    | -0.165  | 0.197   | 0.091  |
| JOBSAT   | -0.388   | 0.305    | -0.484  | 0.424   | 0.264  |
| ORGCOMIT | -0.323   | 0.340    | -0.430  | 0.386   | 0.246  |
| TURNOVER | 0.349    | -0.237   | 0.434   | -0.372  | -0.272 |
| LAYOFF   | 0.043    | -0.112   | 0.115   | -0.131  | -0.095 |
| GENDERM  | 0.040    | -0.094   | 0.040   | 0.043   | 0.094  |
| RACE2    | 0.023    | -0.086   | 0.047   | -0.051  | 0.065  |
| AGE      | -0.112   | 0.029    | -0.048  | -0.016  | -0.173 |



|          | SUPAGGR2 | FRNDFRM2 | POORLDR | ORGJUST | PROMO2 |
|----------|----------|----------|---------|---------|--------|
| EDUC     | -0.098   | 0.009    | -0.049  | -0.059  | -0.026 |
| INCOME10 | 0.006    | 0.015    | 0.004   | 0.037   | 0.018  |
| MA       | 0.017    | 0.052    | -0.024  | -0.040  | -0.013 |
| ENC      | 0.005    | -0.029   | 0.002   | 0.022   | -0.005 |
| WNC      | 0.016    | 0.057    | 0.006   | -0.026  | -0.022 |
| SA       | 0.011    | -0.019   | -0.018  | -0.024  | 0.014  |
| ESC      | -0.023   | -0.003   | -0.032  | -0.023  | 0.002  |
| WSC      | -0.047   | -0.026   | 0.037   | 0.042   | -0.003 |
| MNT      | 0.004    | 0.006    | 0.049   | -0.011  | -0.021 |
| PAC      | 0.011    | -0.028   | 0.012   | 0.059   | 0.020  |
| SOC2NN2  | -0.140   | 0.084    | -0.052  | -0.046  | -0.061 |
| SOC2NN3  | 0.103    | -0.056   | 0.031   | 0.017   | 0.033  |
| SOC2NN4  | 0.091    | 0.027    | 0.011   | 0.083   | 0.069  |
| SOC2NN5  | 0.011    | -0.026   | -0.003  | -0.035  | -0.047 |
| SOC2NN7  | 0.010    | 0.013    | 0.017   | 0.041   | -0.006 |
| SOC2NN8  | 0.020    | -0.028   | -0.019  | 0.006   | 0.005  |
| SOC2NN9  | -0.008   | 0.025    | -0.002  | 0.034   | 0.047  |
| SOC2NN10 | 0.047    | -0.064   | 0.102   | -0.092  | -0.051 |
| NAICSA2  | -0.031   | 0.018    | -0.037  | 0.032   | 0.039  |
| NAICSA3  | 0.031    | -0.077   | 0.094   | -0.016  | 0.023  |
| NAICSA4  | -0.029   | -0.052   | -0.024  | -0.023  | 0.021  |
| NAICSA5  | 0.008    | -0.013   | -0.044  | 0.030   | 0.039  |
| NAICSA6  | -0.018   | -0.016   | -0.014  | 0.018   | 0.034  |
| NAICSA7  | -0.093   | 0.078    | -0.028  | -0.047  | -0.096 |
| NAICSA8  | -0.013   | 0.052    | -0.009  | -0.020  | -0.030 |
| NAICSA9  | 0.076    | 0.041    | 0.023   | 0.087   | 0.057  |
| NAICSA10 | -0.002   | -0.095   | -0.001  | 0.005   | -0.060 |

|          | SUPAGGR2 | FRNDFRM2 | POORLDR | ORGJUST | PROMO2 |
|----------|----------|----------|---------|---------|--------|
| NAICSA11 | -0.014   | 0.015    | -0.057  | -0.011  | 0.046  |
| NAICSA12 | 0.085    | -0.034   | 0.072   | -0.095  | -0.042 |
| NWRKLOC  | -0.026   | -0.025   | 0.010   | -0.060  | 0.099  |
| EMPWLOC  | -0.036   | -0.052   | 0.008   | -0.066  | 0.091  |
| EMPWTOT  | -0.001   | -0.044   | 0.032   | -0.100  | 0.135  |
| JTYEAR   | -0.068   | 0.083    | 0.004   | -0.017  | -0.177 |
| NWHR560  | -0.009   | 0.066    | 0.102   | -0.067  | 0.038  |
| SEASONAL | -0.009   | -0.005   | -0.011  | 0.017   | 0.010  |
| PRECAREM | 0.016    | -0.093   | -0.022  | -0.038  | -0.054 |
| UNION    | 0.004    | 0.024    | 0.042   | -0.074  | -0.014 |
| QUARTER  | 0.019    | 0.043    | -0.032  | 0.025   | 0.037  |

|          | JOBINSEC | EMPINSEC | NEGRUM | IUFREQ | PFAT   |
|----------|----------|----------|--------|--------|--------|
|          | <hr/>    | <hr/>    | <hr/>  | <hr/>  | <hr/>  |
| JOBINSEC | 1.000    |          |        |        |        |
| EMPINSEC | 0.366    | 1.000    |        |        |        |
| NEGRUM   | 0.070    | 0.077    | 1.000  |        |        |
| IUFREQ   | 0.127    | 0.050    | 0.481  | 1.000  |        |
| PFAT     | 0.123    | 0.140    | 0.264  | 0.399  | 1.000  |
| MFAT     | 0.146    | 0.110    | 0.393  | 0.456  | 0.612  |
| EFAT     | 0.199    | 0.139    | 0.380  | 0.460  | 0.541  |
| DEP      | 0.168    | 0.155    | 0.333  | 0.247  | 0.299  |
| ANX      | 0.142    | 0.178    | 0.330  | 0.258  | 0.240  |
| ANG      | 0.046    | 0.054    | 0.317  | 0.203  | 0.193  |
| HAP      | -0.170   | -0.166   | -0.197 | -0.167 | -0.224 |
| CONF     | -0.140   | -0.194   | -0.174 | -0.085 | -0.165 |
| VIG      | -0.146   | -0.174   | -0.187 | -0.159 | -0.254 |
| PHLTHO   | -0.109   | -0.101   | -0.134 | -0.155 | -0.278 |
| MHLTHO   | -0.194   | -0.181   | -0.266 | -0.221 | -0.293 |
| JOBSAT   | -0.301   | -0.159   | -0.217 | -0.184 | -0.192 |
| ORGCOMIT | -0.255   | -0.085   | -0.099 | -0.074 | -0.138 |
| TURNOVER | 0.267    | 0.050    | 0.168  | 0.168  | 0.185  |
| LAYOFF   | 0.250    | 0.138    | 0.092  | 0.083  | 0.029  |
| GENDERM  | 0.014    | -0.006   | -0.123 | -0.080 | -0.142 |
| RACE2    | 0.087    | 0.024    | -0.160 | -0.040 | 0.045  |
| AGE      | 0.020    | 0.073    | 0.119  | 0.041  | -0.030 |
| EDUC     | -0.046   | -0.038   | 0.235  | 0.113  | -0.045 |
| INCOME10 | 0.008    | 0.000    | 0.142  | 0.090  | 0.011  |
| MA       | 0.003    | 0.045    | 0.018  | 0.005  | -0.011 |
| ENC      | 0.007    | 0.064    | 0.020  | 0.009  | -0.004 |
| WNC      | -0.018   | -0.018   | 0.019  | -0.009 | 0.001  |

|          | JOBINSEC | EMPINSEC | NEGRUM | IUFREQ | PFAT   |
|----------|----------|----------|--------|--------|--------|
| SA       | -0.013   | -0.081   | -0.026 | -0.022 | -0.017 |
| ESC      | -0.002   | -0.017   | -0.049 | -0.040 | -0.038 |
| WSC      | -0.073   | -0.064   | -0.012 | 0.048  | 0.015  |
| MNT      | 0.004    | -0.008   | 0.005  | -0.022 | -0.023 |
| PAC      | 0.061    | 0.054    | 0.003  | 0.021  | 0.074  |
| SOC2NN2  | -0.021   | -0.039   | 0.123  | 0.095  | -0.019 |
| SOC2NN3  | -0.005   | -0.032   | -0.072 | -0.038 | 0.037  |
| SOC2NN4  | -0.034   | -0.026   | -0.025 | -0.017 | 0.018  |
| SOC2NN5  | 0.034    | 0.048    | -0.024 | -0.050 | 0.025  |
| SOC2NN7  | 0.060    | 0.020    | -0.059 | -0.027 | 0.054  |
| SOC2NN8  | -0.020   | 0.044    | -0.005 | -0.019 | -0.011 |
| SOC2NN9  | -0.004   | 0.000    | -0.056 | -0.008 | 0.023  |
| SOC2NN10 | 0.041    | 0.009    | -0.112 | -0.048 | -0.012 |
| NAICSA2  | 0.076    | 0.097    | -0.011 | 0.005  | -0.013 |
| NAICSA3  | 0.020    | -0.041   | -0.075 | 0.019  | 0.036  |
| NAICSA4  | 0.051    | 0.017    | 0.022  | 0.000  | -0.037 |
| NAICSA5  | -0.018   | 0.000    | 0.028  | -0.017 | -0.064 |
| NAICSA6  | 0.013    | 0.007    | 0.024  | 0.031  | -0.038 |
| NAICSA7  | -0.055   | -0.008   | 0.104  | 0.064  | 0.038  |
| NAICSA8  | -0.060   | -0.086   | 0.067  | 0.009  | 0.024  |
| NAICSA9  | -0.020   | -0.029   | -0.128 | -0.065 | 0.005  |
| NAICSA10 | 0.057    | -0.007   | -0.060 | -0.062 | -0.056 |
| NAICSA11 | -0.071   | 0.005    | 0.064  | 0.025  | -0.029 |
| NAICSA12 | 0.018    | 0.056    | -0.049 | -0.051 | 0.044  |
| NWRKLOC  | 0.012    | 0.024    | 0.028  | 0.002  | 0.012  |
| EMPWLOC  | 0.004    | 0.097    | 0.059  | -0.026 | -0.029 |
| EMPWTOT  | -0.022   | 0.053    | 0.078  | 0.003  | 0.037  |

|          | JOBINSEC | EMPINSEC | NEGRUM | IUFREQ | PFAT   |
|----------|----------|----------|--------|--------|--------|
|          | <hr/>    | <hr/>    | <hr/>  | <hr/>  | <hr/>  |
| JTYEAR   | -0.040   | 0.071    | 0.057  | -0.017 | -0.035 |
| NWHR60   | -0.099   | -0.073   | 0.241  | 0.256  | 0.091  |
| SEASONAL | 0.116    | 0.049    | -0.077 | -0.032 | 0.108  |
| PRECAREM | 0.164    | 0.036    | -0.043 | -0.023 | 0.078  |
| UNION    | -0.028   | 0.079    | 0.060  | 0.052  | 0.043  |
| QUARTER  | -0.035   | 0.020    | -0.086 | -0.022 | -0.042 |

|          | MFAT   | EFAT   | DEP    | ANX    | ANG    |
|----------|--------|--------|--------|--------|--------|
|          | <hr/>  | <hr/>  | <hr/>  | <hr/>  | <hr/>  |
| MFAT     | 1.000  |        |        |        |        |
| EFAT     | 0.692  | 1.000  |        |        |        |
| DEP      | 0.321  | 0.372  | 1.000  |        |        |
| ANX      | 0.276  | 0.311  | 0.576  | 1.000  |        |
| ANG      | 0.229  | 0.273  | 0.536  | 0.414  | 1.000  |
| HAP      | -0.227 | -0.320 | -0.360 | -0.200 | -0.230 |
| CONF     | -0.173 | -0.224 | -0.279 | -0.192 | -0.140 |
| VIG      | -0.227 | -0.284 | -0.297 | -0.189 | -0.191 |
| PHLTHO   | -0.204 | -0.204 | -0.235 | -0.212 | -0.156 |
| MHLTHO   | -0.296 | -0.353 | -0.517 | -0.411 | -0.309 |
| JOBSAT   | -0.189 | -0.298 | -0.234 | -0.211 | -0.194 |
| ORGCOMIT | -0.103 | -0.152 | -0.156 | -0.130 | -0.124 |
| TURNOVER | 0.163  | 0.240  | 0.209  | 0.155  | 0.151  |
| LAYOFF   | 0.080  | 0.059  | 0.065  | 0.069  | 0.088  |
| GENDERM  | -0.105 | -0.083 | -0.168 | -0.157 | -0.103 |
| RACE2    | -0.015 | 0.018  | -0.065 | -0.128 | -0.032 |
| AGE      | -0.007 | 0.025  | 0.013  | -0.032 | -0.010 |
| EDUC     | 0.133  | 0.051  | 0.040  | 0.044  | 0.045  |
| INCOME10 | 0.092  | 0.060  | 0.025  | 0.008  | 0.024  |
| MA       | -0.016 | -0.018 | -0.026 | -0.001 | -0.006 |
| ENC      | -0.007 | 0.020  | 0.035  | 0.024  | -0.010 |
| WNC      | -0.012 | -0.032 | 0.017  | -0.023 | -0.052 |
| SA       | 0.006  | -0.007 | 0.003  | -0.005 | 0.065  |
| ESC      | -0.022 | -0.010 | -0.024 | -0.001 | -0.036 |
| WSC      | -0.027 | 0.018  | -0.024 | -0.029 | 0.018  |
| MNT      | 0.013  | -0.011 | -0.027 | -0.043 | -0.026 |
| PAC      | 0.056  | 0.036  | 0.031  | 0.044  | -0.010 |

|          | MFAT   | EFAT   | DEP    | ANX    | ANG    |
|----------|--------|--------|--------|--------|--------|
| SOC2NN2  | 0.069  | 0.000  | 0.030  | 0.045  | 0.034  |
| SOC2NN3  | -0.068 | -0.007 | -0.012 | 0.013  | 0.010  |
| SOC2NN4  | 0.015  | 0.034  | -0.013 | -0.013 | -0.021 |
| SOC2NN5  | 0.044  | 0.057  | 0.054  | 0.040  | -0.018 |
| SOC2NN7  | 0.019  | -0.017 | -0.005 | -0.036 | 0.015  |
| SOC2NN8  | -0.043 | -0.053 | -0.017 | -0.017 | 0.021  |
| SOC2NN9  | -0.027 | -0.038 | -0.049 | -0.026 | -0.009 |
| SOC2NN10 | -0.116 | -0.030 | -0.027 | -0.058 | -0.053 |
| NAICSA2  | 0.007  | -0.011 | -0.048 | -0.042 | -0.032 |
| NAICSA3  | -0.058 | 0.026  | -0.024 | 0.007  | -0.026 |
| NAICSA4  | 0.011  | -0.009 | -0.003 | 0.013  | -0.030 |
| NAICSA5  | -0.008 | 0.002  | 0.006  | -0.018 | 0.020  |
| NAICSA6  | 0.046  | 0.007  | -0.006 | 0.008  | 0.022  |
| NAICSA7  | 0.045  | 0.046  | 0.040  | 0.052  | 0.065  |
| NAICSA8  | 0.010  | -0.007 | 0.048  | 0.036  | -0.002 |
| NAICSA9  | -0.040 | -0.061 | -0.025 | -0.012 | 0.006  |
| NAICSA10 | -0.058 | -0.014 | 0.007  | -0.010 | -0.046 |
| NAICSA11 | 0.032  | 0.032  | -0.020 | -0.019 | 0.005  |
| NAICSA12 | -0.021 | -0.013 | 0.014  | -0.038 | -0.047 |
| NWRKLOC  | 0.045  | 0.038  | -0.015 | 0.028  | -0.009 |
| EMPWLOC  | 0.024  | -0.009 | -0.040 | -0.039 | -0.006 |
| EMPWTOT  | 0.061  | 0.039  | 0.002  | 0.013  | 0.022  |
| JTYEAR   | -0.020 | -0.011 | -0.010 | -0.027 | -0.031 |
| NWHR60   | 0.179  | 0.156  | -0.001 | -0.009 | 0.096  |
| SEASONAL | 0.007  | 0.007  | -0.005 | 0.009  | -0.045 |
| PRECAREM | 0.002  | 0.024  | 0.046  | 0.052  | 0.015  |

|         | MFAT   | EFAT   | DEP    | ANX    | ANG    |
|---------|--------|--------|--------|--------|--------|
|         | <hr/>  | <hr/>  | <hr/>  | <hr/>  | <hr/>  |
| UNION   | 0.031  | 0.001  | -0.012 | -0.005 | 0.012  |
| QUARTER | -0.040 | -0.021 | -0.043 | -0.022 | -0.040 |



|          | HAP    | CONF   | VIG    | PHLTHO | MHLTHO |
|----------|--------|--------|--------|--------|--------|
|          | <hr/>  | <hr/>  | <hr/>  | <hr/>  | <hr/>  |
| HAP      | 1.000  |        |        |        |        |
| CONF     | 0.579  | 1.000  |        |        |        |
| VIG      | 0.632  | 0.622  | 1.000  |        |        |
| PHLTHO   | 0.188  | 0.204  | 0.314  | 1.000  |        |
| MHLTHO   | 0.408  | 0.353  | 0.374  | 0.444  | 1.000  |
| JOBSAT   | 0.315  | 0.271  | 0.265  | 0.124  | 0.260  |
| ORGCOMIT | 0.194  | 0.180  | 0.169  | 0.072  | 0.132  |
| TURNOVER | -0.217 | -0.190 | -0.195 | -0.100 | -0.193 |
| LAYOFF   | -0.105 | -0.075 | -0.079 | -0.038 | -0.057 |
| GENDERM  | -0.079 | 0.010  | 0.009  | 0.056  | 0.057  |
| RACE2    | 0.007  | 0.075  | 0.019  | 0.005  | 0.116  |
| AGE      | -0.013 | 0.032  | -0.026 | 0.001  | 0.056  |
| EDUC     | 0.028  | -0.001 | 0.019  | 0.085  | 0.073  |
| INCOME10 | -0.024 | 0.024  | -0.007 | 0.015  | -0.008 |
| MA       | -0.038 | -0.016 | -0.044 | 0.010  | -0.033 |
| ENC      | -0.023 | -0.008 | -0.013 | -0.049 | -0.063 |
| WNC      | -0.026 | -0.037 | -0.030 | 0.021  | -0.016 |
| SA       | 0.034  | 0.031  | 0.019  | -0.013 | 0.032  |
| ESC      | 0.042  | -0.007 | 0.022  | -0.011 | 0.039  |
| WSC      | 0.011  | 0.016  | 0.019  | 0.118  | 0.059  |
| MNT      | 0.004  | -0.023 | 0.011  | -0.007 | 0.042  |
| PAC      | 0.009  | 0.012  | 0.030  | -0.033 | -0.027 |
| SOC2NN2  | 0.063  | 0.002  | 0.042  | 0.032  | 0.040  |
| SOC2NN3  | 0.011  | 0.035  | 0.018  | 0.001  | 0.009  |
| SOC2NN4  | -0.008 | 0.023  | 0.004  | 0.064  | 0.018  |
| SOC2NN5  | -0.019 | -0.072 | -0.068 | -0.080 | -0.079 |
| SOC2NN7  | -0.014 | 0.039  | 0.028  | 0.032  | 0.012  |

|          | HAP    | CONF   | VIG    | PHLTHO | MHLTHO |
|----------|--------|--------|--------|--------|--------|
| SOC2NN8  | -0.014 | -0.029 | -0.016 | -0.042 | -0.034 |
| SOC2NN9  | -0.001 | 0.033  | 0.036  | -0.084 | -0.004 |
| SOC2NN10 | -0.056 | -0.021 | -0.026 | 0.021  | -0.053 |
| NAICSA2  | -0.016 | 0.008  | -0.020 | -0.074 | -0.009 |
| NAICSA3  | -0.035 | 0.001  | 0.005  | 0.013  | -0.020 |
| NAICSA4  | -0.012 | -0.043 | -0.041 | -0.037 | -0.010 |
| NAICSA5  | -0.024 | -0.007 | -0.017 | 0.000  | -0.032 |
| NAICSA6  | -0.016 | -0.047 | -0.009 | 0.025  | 0.014  |
| NAICSA7  | 0.042  | -0.004 | 0.034  | 0.030  | 0.006  |
| NAICSA8  | 0.050  | 0.011  | 0.019  | 0.000  | 0.030  |
| NAICSA9  | 0.024  | 0.016  | 0.026  | -0.005 | 0.013  |
| NAICSA10 | -0.007 | 0.051  | 0.018  | 0.045  | 0.026  |
| NAICSA11 | -0.012 | 0.018  | -0.041 | 0.006  | 0.003  |
| NAICSA12 | 0.001  | -0.024 | -0.018 | -0.021 | -0.056 |
| NWRKLOC  | -0.020 | 0.031  | -0.021 | -0.042 | -0.006 |
| EMPWLOC  | 0.010  | 0.026  | 0.033  | 0.042  | 0.053  |
| EMPWTOT  | -0.060 | -0.001 | -0.039 | 0.001  | -0.013 |
| JTYEAR   | -0.002 | 0.013  | 0.016  | 0.040  | 0.042  |
| NWHR60   | -0.036 | 0.041  | -0.019 | -0.001 | 0.016  |
| SEASONAL | -0.009 | 0.030  | 0.033  | 0.053  | 0.044  |
| PRECAREM | -0.093 | -0.021 | -0.057 | -0.050 | -0.040 |
| UNION    | 0.015  | 0.013  | 0.012  | 0.017  | 0.003  |
| QUARTER  | 0.053  | 0.068  | 0.086  | 0.030  | 0.047  |

|          | <u>JOBSAT</u> | <u>ORGCOMIT</u> | <u>TURNOVER</u> | <u>LAYOFF</u> | <u>GENDERM</u> |
|----------|---------------|-----------------|-----------------|---------------|----------------|
| JOBSAT   | 1.000         |                 |                 |               |                |
| ORGCOMIT | 0.677         | 1.000           |                 |               |                |
| TURNOVER | -0.703        | -0.681          | 1.000           |               |                |
| LAYOFF   | -0.116        | -0.111          | 0.081           | 1.000         |                |
| GENDERM  | -0.065        | -0.057          | 0.036           | 0.097         | 1.000          |
| RACE2    | -0.075        | -0.108          | 0.100           | 0.048         | 0.002          |
| AGE      | 0.209         | 0.350           | -0.224          | 0.024         | -0.058         |
| EDUC     | 0.084         | 0.079           | -0.072          | 0.060         | -0.051         |
| INCOME10 | 0.061         | 0.096           | -0.080          | 0.067         | 0.058          |
| MA       | -0.022        | -0.008          | 0.001           | -0.024        | 0.006          |
| ENC      | 0.001         | 0.017           | -0.028          | -0.017        | -0.013         |
| WNC      | 0.015         | 0.003           | -0.035          | -0.020        | -0.025         |
| SA       | -0.002        | 0.033           | 0.028           | -0.025        | -0.003         |
| ESC      | -0.006        | 0.000           | 0.020           | -0.025        | 0.019          |
| WSC      | 0.018         | -0.025          | 0.013           | -0.028        | -0.016         |
| MNT      | -0.001        | -0.014          | 0.009           | -0.002        | 0.013          |
| PAC      | -0.004        | -0.018          | 0.008           | 0.113         | 0.017          |
| SOC2NN2  | 0.105         | 0.073           | -0.096          | 0.047         | -0.128         |
| SOC2NN3  | -0.048        | -0.108          | 0.093           | -0.169        | -0.028         |
| SOC2NN4  | -0.050        | -0.101          | 0.061           | -0.010        | -0.028         |
| SOC2NN5  | -0.028        | -0.018          | 0.042           | -0.001        | -0.187         |
| SOC2NN7  | 0.034         | 0.027           | -0.016          | 0.057         | 0.155          |
| SOC2NN8  | -0.050        | 0.023           | -0.030          | -0.031        | 0.159          |
| SOC2NN9  | 0.036         | 0.057           | -0.062          | -0.002        | 0.081          |
| SOC2NN10 | -0.103        | -0.091          | 0.060           | 0.032         | 0.178          |
| NAICSA2  | 0.012         | 0.057           | -0.016          | 0.104         | 0.145          |
| NAICSA3  | -0.129        | -0.164          | 0.115           | -0.001        | 0.015          |

|           | JOB SAT | ORG COMMIT | TURN OVER | LAY OFF | GENDER M |
|-----------|---------|------------|-----------|---------|----------|
| NAICSA4   | 0.008   | 0.010      | -0.015    | 0.111   | 0.024    |
| NAICSA5   | -0.003  | 0.013      | -0.023    | 0.037   | -0.006   |
| NAICSA6   | -0.026  | -0.023     | 0.009     | 0.043   | 0.060    |
| NAICSA7   | 0.114   | 0.150      | -0.127    | 0.009   | -0.179   |
| NAICSA8   | 0.025   | 0.008      | -0.012    | -0.091  | -0.256   |
| NAICSA9   | -0.023  | -0.142     | 0.103     | -0.079  | 0.002    |
| NAICSA10  | -0.050  | -0.025     | 0.059     | -0.027  | 0.050    |
| NAICSA11  | 0.062   | 0.096      | -0.079    | -0.120  | 0.093    |
| NAICSA12  | -0.012  | -0.003     | -0.007    | 0.012   | 0.078    |
| NWRKLOC   | -0.013  | -0.010     | -0.009    | 0.116   | 0.072    |
| EMPWLOC   | 0.018   | 0.045      | -0.082    | 0.170   | 0.013    |
| EMPWTOT   | -0.013  | -0.012     | -0.023    | 0.179   | 0.038    |
| JTYEAR    | 0.133   | 0.236      | -0.165    | 0.028   | 0.004    |
| NWHR60    | 0.039   | 0.140      | -0.094    | 0.138   | 0.178    |
| SEASONAL  | -0.017  | -0.017     | 0.005     | -0.048  | 0.038    |
| PRE CAREM | -0.074  | -0.095     | 0.053     | 0.040   | 0.041    |
| UNION     | 0.058   | 0.108      | -0.163    | 0.071   | 0.022    |
| QUARTER   | 0.060   | 0.019      | -0.016    | -0.099  | 0.043    |

|          | RACE2  | AGE    | EDUC   | INCOME10 | MA     |
|----------|--------|--------|--------|----------|--------|
|          |        |        |        |          |        |
| RACE2    | 1.000  |        |        |          |        |
| AGE      | -0.125 | 1.000  |        |          |        |
| EDUC     | -0.139 | 0.225  | 1.000  |          |        |
| INCOME10 | -0.059 | 0.171  | 0.248  | 1.000    |        |
| MA       | -0.056 | 0.030  | 0.030  | 0.018    | 1.000  |
| ENC      | -0.128 | -0.008 | -0.038 | -0.045   | -0.171 |
| WNC      | -0.102 | 0.035  | -0.027 | -0.026   | -0.114 |
| SA       | 0.092  | 0.024  | 0.013  | -0.024   | -0.207 |
| ESC      | 0.009  | -0.048 | -0.014 | -0.041   | -0.107 |
| WSC      | 0.021  | -0.039 | -0.017 | -0.014   | -0.124 |
| MNT      | -0.031 | 0.038  | 0.042  | 0.018    | -0.104 |
| PAC      | 0.165  | -0.054 | -0.021 | 0.056    | -0.180 |
| SOC2NN2  | -0.068 | 0.153  | 0.523  | 0.101    | -0.043 |
| SOC2NN3  | 0.037  | -0.189 | -0.226 | -0.131   | -0.005 |
| SOC2NN4  | -0.018 | -0.143 | -0.174 | -0.075   | 0.022  |
| SOC2NN5  | 0.018  | 0.019  | -0.127 | -0.068   | 0.008  |
| SOC2NN7  | 0.031  | -0.024 | -0.126 | -0.040   | -0.031 |
| SOC2NN8  | -0.010 | -0.007 | -0.136 | -0.028   | 0.029  |
| SOC2NN9  | -0.017 | -0.034 | -0.153 | -0.055   | -0.042 |
| SOC2NN10 | 0.048  | -0.060 | -0.247 | -0.061   | 0.024  |
| NAICSA2  | -0.005 | 0.048  | -0.099 | 0.020    | -0.003 |
| NAICSA3  | -0.017 | -0.114 | -0.210 | -0.078   | -0.002 |
| NAICSA4  | 0.006  | 0.030  | 0.024  | 0.019    | 0.003  |
| NAICSA5  | -0.041 | 0.028  | 0.055  | 0.111    | 0.051  |
| NAICSA6  | -0.050 | 0.005  | 0.168  | 0.069    | -0.017 |
| NAICSA7  | -0.034 | 0.153  | 0.280  | 0.019    | -0.036 |
| NAICSA8  | 0.015  | 0.013  | 0.083  | -0.014   | 0.032  |

|          | RACE2  | AGE    | EDUC   | INCOME10 | MA     |
|----------|--------|--------|--------|----------|--------|
| NAICSA9  | 0.068  | -0.259 | -0.216 | -0.116   | 0.005  |
| NAICSA10 | 0.032  | -0.005 | -0.033 | -0.048   | -0.038 |
| NAICSA11 | -0.018 | 0.096  | 0.121  | 0.078    | 0.024  |
| NAICSA12 | 0.060  | 0.041  | -0.114 | -0.011   | 0.021  |
| NWRKLOC  | 0.006  | 0.096  | 0.047  | 0.035    | -0.031 |
| EMPWLOC  | 0.010  | 0.126  | 0.203  | 0.117    | 0.010  |
| EMPWTOT  | -0.025 | 0.095  | 0.174  | 0.089    | -0.003 |
| JTYEAR   | -0.077 | 0.452  | 0.080  | 0.083    | 0.035  |
| NWHR560  | -0.073 | 0.212  | 0.229  | 0.207    | -0.030 |
| SEASONAL | 0.070  | -0.093 | -0.081 | -0.075   | -0.040 |
| PRECAREM | 0.071  | -0.088 | -0.088 | -0.066   | 0.018  |
| UNION    | 0.013  | 0.135  | 0.084  | 0.030    | 0.069  |
| QUARTER  | 0.060  | -0.006 | -0.021 | -0.020   | -0.021 |

|          | ENC    | WNC    | SA     | ESC    | WSC    |
|----------|--------|--------|--------|--------|--------|
| ENC      | 1.000  |        |        |        |        |
| WNC      | -0.119 | 1.000  |        |        |        |
| SA       | -0.217 | -0.144 | 1.000  |        |        |
| ESC      | -0.112 | -0.074 | -0.135 | 1.000  |        |
| WSC      | -0.130 | -0.086 | -0.157 | -0.081 | 1.000  |
| MNT      | -0.109 | -0.073 | -0.132 | -0.068 | -0.079 |
| PAC      | -0.188 | -0.125 | -0.228 | -0.118 | -0.136 |
| SOC2NN2  | -0.009 | -0.017 | 0.009  | -0.029 | 0.034  |
| SOC2NN3  | 0.063  | 0.001  | -0.022 | -0.013 | -0.007 |
| SOC2NN4  | -0.002 | -0.004 | -0.020 | 0.005  | 0.014  |
| SOC2NN5  | -0.007 | 0.016  | 0.004  | 0.037  | -0.003 |
| SOC2NN7  | -0.001 | 0.019  | -0.033 | -0.015 | -0.054 |
| SOC2NN8  | -0.009 | -0.033 | 0.023  | 0.029  | -0.042 |
| SOC2NN9  | 0.070  | 0.064  | 0.007  | -0.024 | -0.032 |
| SOC2NN10 | -0.029 | 0.032  | 0.026  | 0.000  | 0.018  |
| NAICSA2  | 0.079  | 0.076  | -0.033 | -0.026 | -0.054 |
| NAICSA3  | 0.020  | -0.013 | -0.052 | 0.015  | 0.109  |
| NAICSA4  | -0.016 | -0.001 | 0.003  | -0.028 | -0.018 |
| NAICSA5  | -0.044 | -0.004 | 0.008  | 0.002  | 0.008  |
| NAICSA6  | -0.023 | -0.006 | 0.002  | 0.029  | -0.002 |
| NAICSA7  | 0.021  | 0.001  | -0.022 | -0.046 | 0.072  |
| NAICSA8  | 0.028  | -0.010 | -0.033 | 0.027  | -0.032 |
| NAICSA9  | -0.028 | -0.025 | 0.006  | -0.028 | -0.027 |
| NAICSA10 | -0.025 | -0.008 | 0.095  | 0.084  | -0.031 |
| NAICSA11 | -0.051 | -0.026 | 0.060  | -0.006 | 0.004  |
| NAICSA12 | -0.007 | 0.014  | 0.063  | -0.005 | -0.051 |
| NWRKLOC  | -0.011 | 0.005  | 0.037  | 0.017  | -0.034 |

|          | ENC    | WNC    | SA     | ESC    | WSC    |
|----------|--------|--------|--------|--------|--------|
| EMPWLOC  | 0.031  | 0.013  | -0.012 | -0.027 | -0.038 |
| EMPWTOT  | -0.006 | 0.009  | 0.031  | -0.015 | -0.033 |
| JTYEAR   | 0.032  | 0.069  | -0.064 | -0.044 | -0.049 |
| NWHR60   | -0.025 | -0.024 | 0.064  | 0.010  | 0.057  |
| SEASONAL | -0.017 | 0.067  | -0.048 | 0.038  | -0.006 |
| PRECAREM | 0.014  | -0.036 | -0.037 | -0.010 | 0.001  |
| UNION    | 0.075  | -0.021 | -0.114 | -0.081 | -0.091 |
| QUARTER  | -0.031 | 0.027  | 0.019  | 0.071  | -0.057 |



|          | MNT    | PAC    | SOC2NN2 | SOC2NN3 | SOC2NN4 |
|----------|--------|--------|---------|---------|---------|
|          | _____  | _____  | _____   | _____   | _____   |
| MNT      | 1.000  |        |         |         |         |
| PAC      | -0.115 | 1.000  |         |         |         |
| SOC2NN2  | 0.069  | -0.003 | 1.000   |         |         |
| SOC2NN3  | -0.056 | 0.033  | -0.289  | 1.000   |         |
| SOC2NN4  | -0.009 | 0.008  | -0.202  | -0.123  | 1.000   |
| SOC2NN5  | -0.043 | -0.020 | -0.282  | -0.172  | -0.120  |
| SOC2NN7  | 0.064  | 0.046  | -0.122  | -0.074  | -0.052  |
| SOC2NN8  | 0.008  | 0.004  | -0.135  | -0.082  | -0.057  |
| SOC2NN9  | -0.002 | -0.033 | -0.135  | -0.082  | -0.057  |
| SOC2NN10 | -0.017 | -0.035 | -0.187  | -0.113  | -0.079  |
| NAICSA2  | 0.014  | -0.041 | -0.074  | -0.134  | -0.068  |
| NAICSA3  | -0.006 | -0.027 | -0.203  | -0.094  | 0.421   |
| NAICSA4  | -0.002 | 0.039  | 0.009   | -0.073  | 0.006   |
| NAICSA5  | -0.016 | -0.024 | -0.104  | -0.114  | 0.067   |
| NAICSA6  | 0.044  | -0.022 | 0.211   | -0.110  | -0.071  |
| NAICSA7  | 0.011  | 0.007  | 0.383   | -0.085  | -0.117  |
| NAICSA8  | -0.008 | -0.014 | 0.171   | 0.094   | -0.119  |
| NAICSA9  | -0.032 | 0.085  | -0.199  | 0.474   | -0.011  |
| NAICSA10 | -0.053 | -0.011 | -0.085  | 0.086   | 0.047   |
| NAICSA11 | 0.000  | -0.007 | -0.008  | 0.025   | -0.071  |
| NAICSA12 | -0.021 | -0.031 | -0.139  | -0.082  | -0.060  |
| NWRKLOC  | 0.037  | -0.034 | -0.033  | -0.095  | 0.062   |
| EMPWLOC  | 0.014  | -0.006 | 0.154   | -0.155  | -0.108  |
| EMPWTOT  | 0.032  | -0.026 | 0.063   | -0.140  | 0.014   |
| JTYEAR   | 0.013  | 0.002  | 0.115   | -0.112  | -0.093  |
| NWHR60   | 0.015  | -0.074 | 0.105   | -0.218  | -0.133  |
| SEASONAL | -0.044 | 0.065  | 0.006   | 0.052   | 0.011   |

|          | MNT    | PAC   | SOC2NN2 | SOC2NN3 | SOC2NN4 |
|----------|--------|-------|---------|---------|---------|
|          | <hr/>  | <hr/> | <hr/>   | <hr/>   | <hr/>   |
| PRECAREM | -0.028 | 0.076 | -0.026  | -0.014  | 0.025   |
| UNION    | -0.019 | 0.126 | 0.115   | -0.033  | -0.104  |
| QUARTER  | 0.018  | 0.001 | 0.001   | 0.036   | 0.037   |

|          | SOC2NN5 | SOC2NN7 | SOC2NN8 | SOC2NN9 | SOC2NN10 |
|----------|---------|---------|---------|---------|----------|
|          | _____   | _____   | _____   | _____   | _____    |
| SOC2NN5  | 1.000   |         |         |         |          |
| SOC2NN7  | -0.072  | 1.000   |         |         |          |
| SOC2NN8  | -0.080  | -0.035  | 1.000   |         |          |
| SOC2NN9  | -0.080  | -0.035  | -0.038  | 1.000   |          |
| SOC2NN10 | -0.111  | -0.048  | -0.053  | -0.053  | 1.000    |
| NAICSA2  | -0.005  | -0.021  | 0.094   | 0.384   | 0.015    |
| NAICSA3  | 0.030   | -0.066  | -0.056  | -0.003  | 0.147    |
| NAICSA4  | 0.058   | -0.031  | 0.149   | -0.034  | -0.043   |
| NAICSA5  | 0.160   | -0.016  | -0.028  | -0.054  | -0.074   |
| NAICSA6  | -0.027  | -0.047  | -0.051  | -0.041  | -0.071   |
| NAICSA7  | -0.078  | -0.068  | -0.047  | -0.080  | -0.107   |
| NAICSA8  | -0.019  | -0.074  | -0.082  | -0.070  | -0.101   |
| NAICSA9  | -0.058  | -0.058  | -0.048  | -0.050  | -0.028   |
| NAICSA10 | -0.009  | -0.021  | 0.067   | -0.019  | -0.030   |
| NAICSA11 | 0.001   | -0.029  | 0.065   | 0.001   | -0.056   |
| NAICSA12 | 0.038   | -0.028  | -0.036  | -0.040  | 0.528    |
| NWRKLOC  | 0.007   | -0.007  | 0.018   | -0.008  | -0.009   |
| EMPWLOC  | -0.017  | -0.091  | -0.041  | 0.041   | 0.004    |
| EMPWTOT  | 0.013   | -0.139  | -0.006  | 0.011   | -0.020   |
| JTYEAR   | -0.013  | -0.007  | 0.025   | -0.007  | 0.010    |
| NWHR60   | -0.106  | -0.002  | 0.031   | 0.049   | 0.023    |
| SEASONAL | -0.026  | 0.172   | -0.051  | -0.051  | 0.020    |
| PRECAREM | -0.021  | 0.158   | 0.005   | 0.001   | 0.071    |
| UNION    | -0.067  | 0.033   | 0.055   | 0.025   | 0.060    |
| QUARTER  | -0.017  | -0.027  | 0.031   | 0.059   | -0.054   |

|          | NAICSA2 | NAICSA3 | NAICSA4 | NAICSA5 | NAICSA6 |
|----------|---------|---------|---------|---------|---------|
| NAICSA2  | 1.000   |         |         |         |         |
| NAICSA3  | -0.126  | 1.000   |         |         |         |
| NAICSA4  | -0.058  | -0.065  | 1.000   |         |         |
| NAICSA5  | -0.092  | -0.102  | -0.047  | 1.000   |         |
| NAICSA6  | -0.088  | -0.099  | -0.046  | -0.072  | 1.000   |
| NAICSA7  | -0.136  | -0.152  | -0.070  | -0.111  | -0.107  |
| NAICSA8  | -0.140  | -0.157  | -0.072  | -0.114  | -0.110  |
| NAICSA9  | -0.109  | -0.122  | -0.056  | -0.089  | -0.086  |
| NAICSA10 | -0.087  | -0.098  | -0.045  | -0.071  | -0.069  |
| NAICSA11 | -0.098  | -0.110  | -0.051  | -0.080  | -0.077  |
| NAICSA12 | -0.069  | -0.077  | -0.035  | -0.056  | -0.054  |
| NWRKLOC  | 0.024   | 0.073   | 0.079   | 0.093   | 0.009   |
| EMPWLOC  | 0.193   | -0.086  | 0.070   | 0.006   | -0.040  |
| EMPWTOT  | 0.096   | 0.044   | 0.086   | 0.102   | -0.028  |
| JTYEAR   | 0.042   | -0.074  | 0.026   | -0.015  | 0.014   |
| NWHR60   | 0.106   | -0.073  | 0.070   | 0.078   | 0.059   |
| SEASONAL | -0.060  | -0.053  | -0.018  | -0.071  | -0.064  |
| PRECAREM | -0.041  | 0.006   | 0.005   | -0.009  | -0.053  |
| UNION    | -0.074  | -0.085  | -0.041  | -0.097  | -0.098  |
| QUARTER  | 0.045   | -0.037  | -0.040  | 0.018   | -0.026  |

|          | NAICSA7 | NAICSA8 | NAICSA9 | NAICSA10 | NAICSA11 |
|----------|---------|---------|---------|----------|----------|
|          | _____   | _____   | _____   | _____    | _____    |
| NAICSA7  | 1.000   |         |         |          |          |
| NAICSA8  | -0.170  | 1.000   |         |          |          |
| NAICSA9  | -0.132  | -0.136  | 1.000   |          |          |
| NAICSA10 | -0.106  | -0.109  | -0.085  | 1.000    |          |
| NAICSA11 | -0.119  | -0.123  | -0.095  | -0.076   | 1.000    |
| NAICSA12 | -0.083  | -0.085  | -0.067  | -0.053   | -0.060   |
| NWRKLOC  | -0.092  | -0.034  | -0.103  | -0.073   | 0.075    |
| EMPWLOC  | 0.039   | 0.076   | -0.138  | -0.144   | 0.024    |
| EMPWTOT  | -0.021  | -0.010  | -0.132  | -0.148   | 0.073    |
| JTYEAR   | 0.115   | -0.025  | -0.114  | -0.042   | 0.034    |
| NWHR560  | 0.082   | -0.106  | -0.219  | -0.044   | 0.080    |
| SEASONAL | 0.112   | -0.059  | 0.065   | 0.111    | -0.061   |
| PRECAREM | 0.002   | -0.055  | -0.040  | 0.091    | -0.027   |
| UNION    | 0.240   | -0.025  | -0.100  | -0.091   | 0.174    |
| QUARTER  | -0.044  | 0.003   | 0.061   | 0.017    | 0.032    |

|          | NAICSA12 | NWRKLOC | EMPWLOC | EMPWTOT | JTYEAR |
|----------|----------|---------|---------|---------|--------|
|          | —————    | —————   | —————   | —————   | —————  |
| NAICSA12 | 1.000    |         |         |         |        |
| NWRKLOC  | 0.052    | 1.000   |         |         |        |
| EMPWLOC  | 0.070    | 0.195   | 1.000   |         |        |
| EMPWTOT  | 0.076    | 0.589   | 0.627   | 1.000   |        |
| JTYEAR   | 0.091    | 0.011   | 0.084   | 0.064   | 1.000  |
| NWHR60   | 0.024    | 0.124   | 0.174   | 0.196   | 0.121  |
| SEASONAL | 0.004    | -0.078  | -0.066  | -0.136  | -0.063 |
| PRECAREM | 0.055    | 0.030   | -0.105  | -0.067  | -0.088 |
| UNION    | 0.168    | 0.051   | 0.135   | 0.135   | 0.247  |
| QUARTER  | -0.011   | -0.044  | -0.046  | -0.041  | 0.004  |

|          | NWHR60 | SEASONAL | PRECAREM | UNION  | QUARTER |
|----------|--------|----------|----------|--------|---------|
|          | _____  | _____    | _____    | _____  | _____   |
| NWHR60   | 1.000  |          |          |        |         |
| SEASONAL | -0.147 | 1.000    |          |        |         |
| PRECAREM | -0.147 | 0.243    | 1.000    |        |         |
| UNION    | 0.096  | 0.022    | -0.019   | 1.000  |         |
| QUARTER  | -0.062 | 0.024    | 0.012    | -0.049 | 1.000   |
